# Supplementary material for: Solvation dynamics on the diffusion timescale elucidated using energy-represented dynamics theory
Source: Royal Society of Chemistry journal article supplement (doi:10.1039/d4cp00235k), 2024-01-01
Supplement: d4cp00235k1.pdf [file d4cp00235k1.pdf]

# Solvation dynamics on the diffusion timescale elucidated using energy-represented dynamics theory

Kazuya Okita, Natsuumi Ito, Hiroshi Umakoshi, Nozomi Morishita-Watanabe, Kento Kasahara,\*  
and Nobuyuki Matubayasi

*Division of Chemical Engineering, Graduate School of Engineering Science, Osaka University,  
Toyonaka, Osaka 560-8531, Japan*

---

\*Author to whom corresponding should be addressed: [kasahara@cheng.es.osaka-u.ac.jp](mailto:kasahara@cheng.es.osaka-u.ac.jp)

Table S1: Atomic charges on Prodan at the ground (GS) and excited (ES) states. The label of each atom is shown in Fig. S1.

| site name     | atomic charge at GS ( $e$ ) | atomic charge at ES ( $e$ ) | difference |
|---------------|-----------------------------|-----------------------------|------------|
| C1            | -0.16703                    | -0.20922                    | -0.04219   |
| C2            | -0.21334                    | -0.30112                    | -0.08778   |
| C3            | 0.30188                     | 0.30558                     | 0.00370    |
| C4            | -0.40712                    | -0.30964                    | 0.09748    |
| C5            | 0.20250                     | 0.16139                     | -0.04111   |
| C6            | 0.11120                     | 0.20825                     | 0.09705    |
| C7            | -0.21616                    | -0.33364                    | -0.11748   |
| C8            | -0.07123                    | 0.02150                     | 0.09273    |
| C9            | -0.01159                    | -0.05330                    | -0.04171   |
| C10           | -0.23902                    | -0.25537                    | -0.01635   |
| C11           | 0.09300                     | 0.06970                     | -0.02330   |
| C12           | 0.09210                     | 0.08956                     | -0.00254   |
| N             | -0.26505                    | -0.19167                    | 0.07338    |
| C13           | 0.38845                     | 0.31197                     | -0.07648   |
| O             | -0.44136                    | -0.45568                    | -0.01432   |
| C14           | 0.15965                     | 0.24546                     | 0.08581    |
| C15           | -0.14782                    | -0.19386                    | -0.04604   |
| H1            | 0.11247                     | 0.11805                     | 0.00558    |
| H2            | 0.12682                     | 0.13465                     | 0.00783    |
| H3            | 0.16547                     | 0.13830                     | -0.02717   |
| H4            | 0.11577                     | 0.10156                     | -0.01421   |
| H5            | 0.08113                     | 0.08488                     | 0.00375    |
| H6            | 0.11117                     | 0.10350                     | -0.00767   |
| H7, H8, H9    | 0.01343                     | 0.03329                     | 0.01986    |
| H10, H11, H12 | 0.01296                     | 0.02878                     | 0.01582    |
| H13, H14      | -0.02970                    | -0.04745                    | -0.01775   |
| H15, H16, H17 | 0.03278                     | 0.03928                     | 0.00650    |

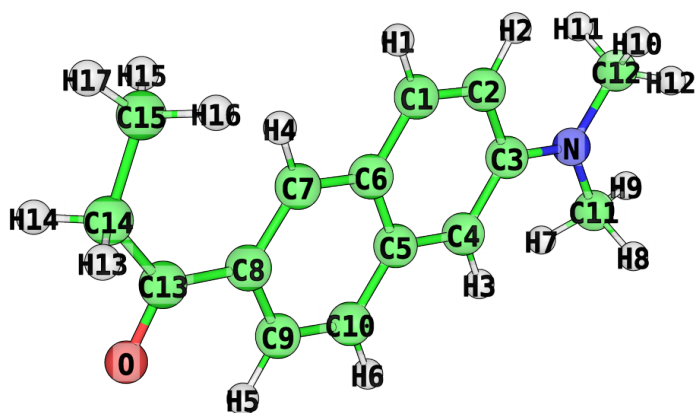

Fig. S1: Definitions of the atom labels for Prodan.

(a) Water

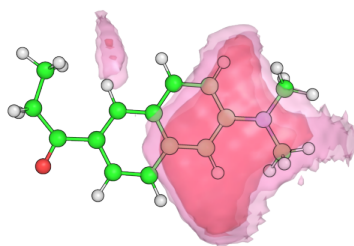

(b) MeOH

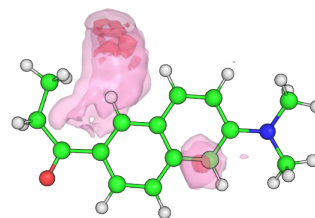

(c) EtOH

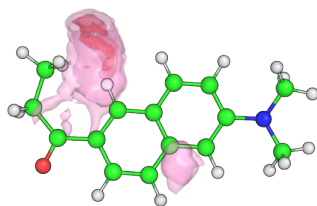

(d) PrOH

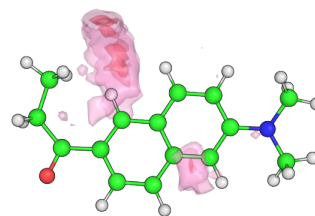

Fig. S2: Spatial distribution functions (SDFs) of the hydroxyl hydrogens corresponding to the destabilized region ( $\epsilon \geq 1.0 \text{ kcal mol}^{-1}$ ) for (a) water, (b) MeOH, (c) EtOH, and (d) PrOH. The isovalues of SDFs for solid and transparent surfaces are 0.1 and 0.05, respectively, relative to the bulk density.

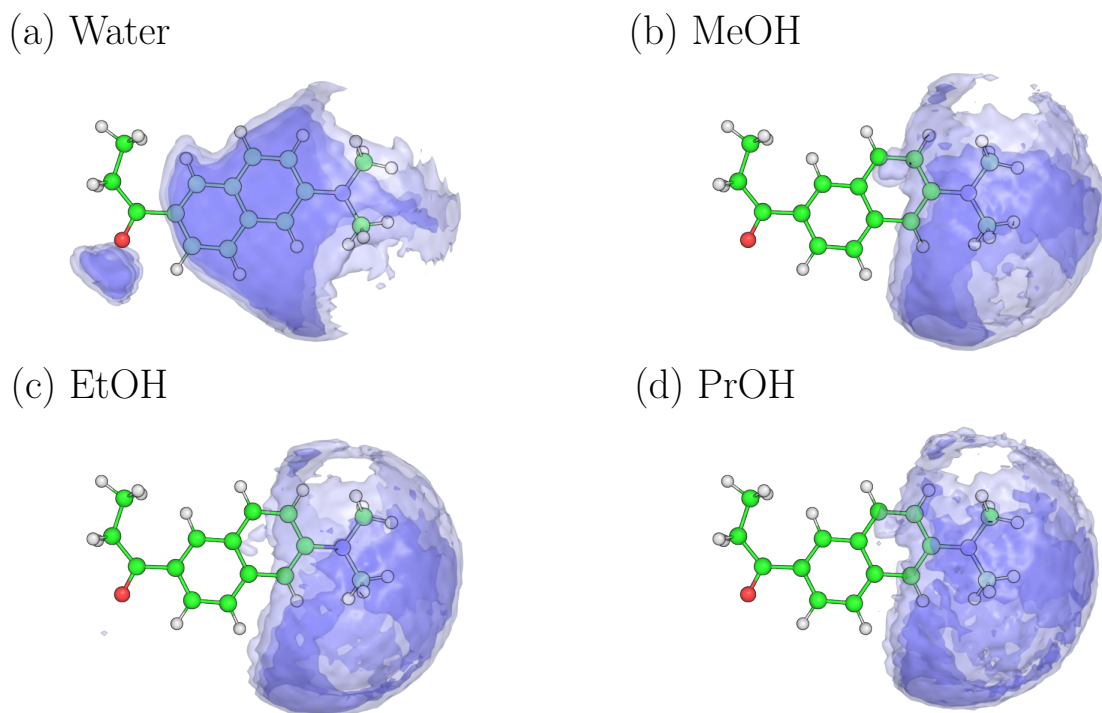

Fig. S3: Spatial distribution functions (SDFs) of the hydroxyl hydrogens corresponding to the stabilized region ( $\epsilon \leq -1.0$  kcal mol<sup>-1</sup>) for (a) water, (b) MeOH, (c) EtOH, and (d) PrOH, respectively. The isovalues of SDFs for solid and transparent surfaces are 0.1 and 0.05, respectively, relative to the bulk density.

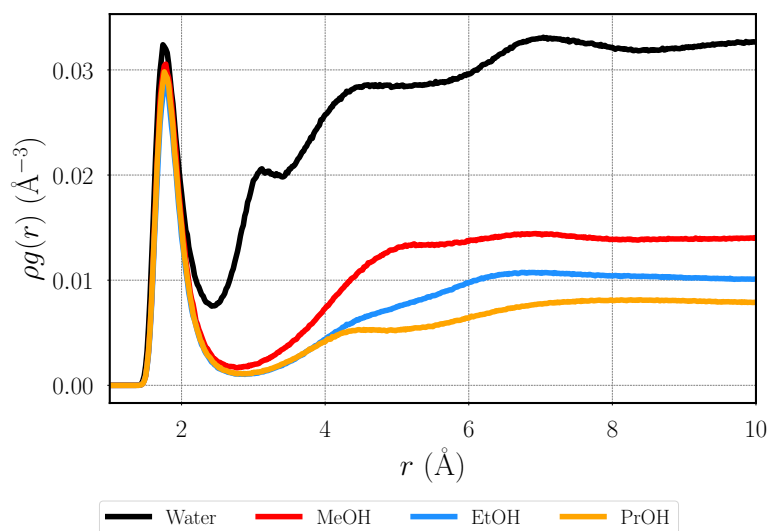

Fig. S4: Radial densities of the hydroxyl hydrogens around the oxygen atom of Prodan,  $\rho g(r)$ .
